# Supplementary material for: Surface properties of SnO2 nanowires for enhanced performance with dye-sensitized solar cells
Source: Royal Society of Chemistry journal article supplement (doi:10.1039/b910174h), 2009-01-01
Supplement: b910174h.pdf [file b910174h.pdf]

## Supplementary information

The electron lifetime of SnO<sub>2</sub> nanowires and nanoparticles showing a two orders of magnitude longer lifetime for nanowires.<sup>1</sup>

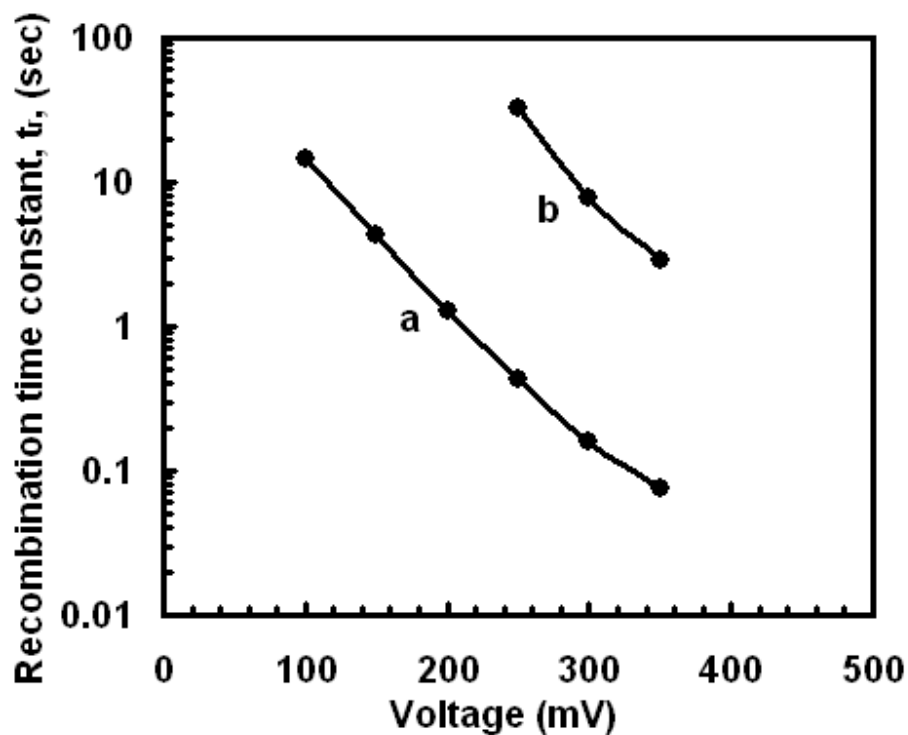

Supplementary Figure: The electron lifetimes in (a) SnO<sub>2</sub> nanoparticles and (b) SnO<sub>2</sub> nanowires.

1. S. Gubbala, V. Chakrapani, V. Kumar, and M.K. Sunkara, *Adv. Funct. Mater.*, 18, 1 (2008)
